# Supplementary figures and images for: Systemic Biomarkers and Unique Pathways in Different Phenotypes of Heart Failure with Preserved Ejection Fraction
Source: MDPI journal article supplement (doi:10.3390/biom12101419), 2022-10-04

# Regulation of IGF transport and uptake by IGFBP

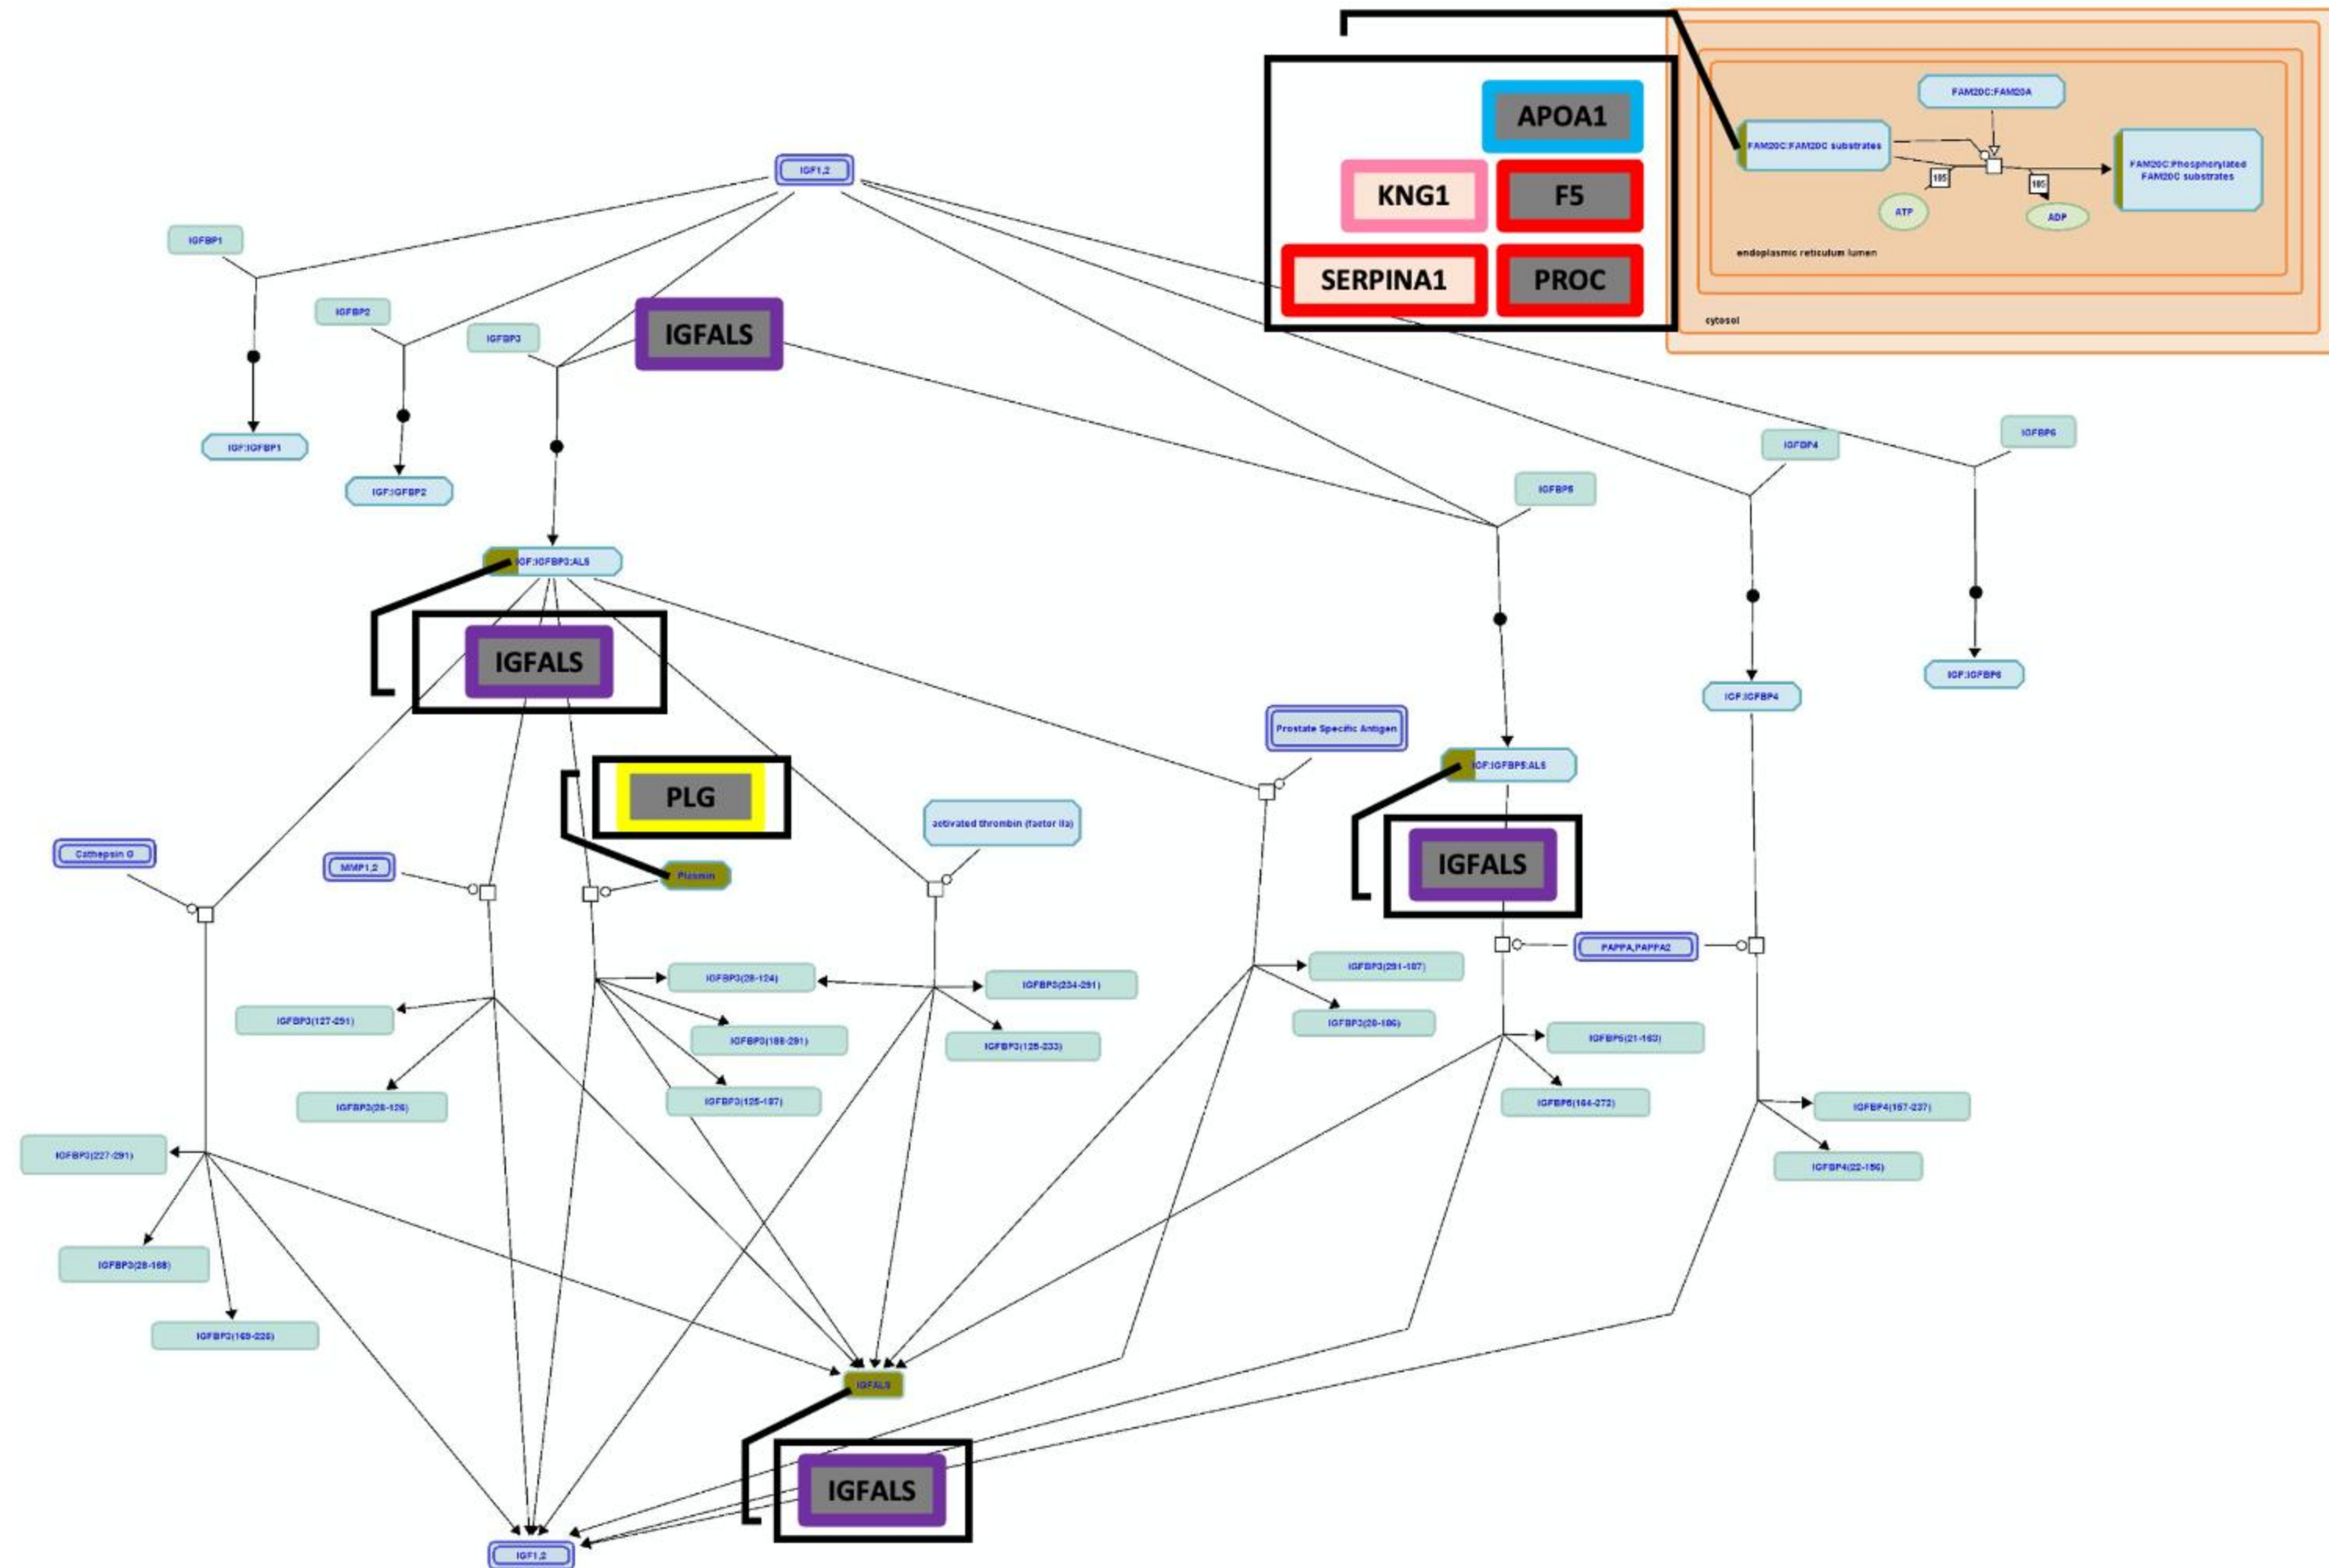

Supplement: s1 [file s1]
